# Supplementary material
Source: PubMed Central journal article supplement (PMC6648440)
Supplement: ao8b01945_si_001.pdf [file ao8b01945_si_001.pdf]

## Supporting Information

# Selective Interactions of Al(III) with Plasmonic AgNPs by Colorimetric, Kinetic and Thermodynamic Studies

Ritu Painuli<sup>†</sup>, Sapna Raghav<sup>†</sup>, and Dinesh Kumar<sup>†,‡</sup>

<sup>†</sup>Department of Chemistry, Banasthali Vidyapith, Banasthali, Tonk 304022, Rajasthan, India,

<sup>‡</sup>School of Chemical Sciences, Central University of Gujarat, Gandhinagar 382030, Gujarat, India

### Contents

**Figure S1.** Effect of pH **(a)** on the synthesis, and **(b)** stability of prepared 5H-I2CA@AgNPs. Inset of figure shows the change in their solutions;

**Figure S2.** **(a)** UV-vis spectra of the AgNPs prepared at different temperatures, inset shows the photographs of the corresponding solutions, and **(b)** different concentrations of 5H-I2CA, inset shows colorimetric changes at different concentrations of 5H-I2CA;

**Figure S3.** **(a & b)** Represent the calculation of FWHM of 5H-I2CA@AgNPs synthesized at different concentrations of 5H-I2CA;

**Figure S4.** FTIR spectra of (a) 5H-I2CA, (b) 5H-I2CA@AgNPs, (c) 5H-I2CA@AgNPs + Al(III);

**Figure S5.** **(a-c)** size distribution of 5H-I2CA@AgNPs before and after the addition of Al(III) ions;

**Figure S6.** **(a)** SPR spectra of 5H-I2CA@AgNPs after the addition of various concentration of Al(III) ions on to the tap water, **(b)** Colorimetric response of the synthesized of 5H-I2CA@AgNPs in tap water, **(c)** Plot of absorbance intensity difference versus concentrations of Al(III) ions in tap water samples.

**Table S1.** The comparison table demonstrating LOD's of available probes for the detection of the Al(III)

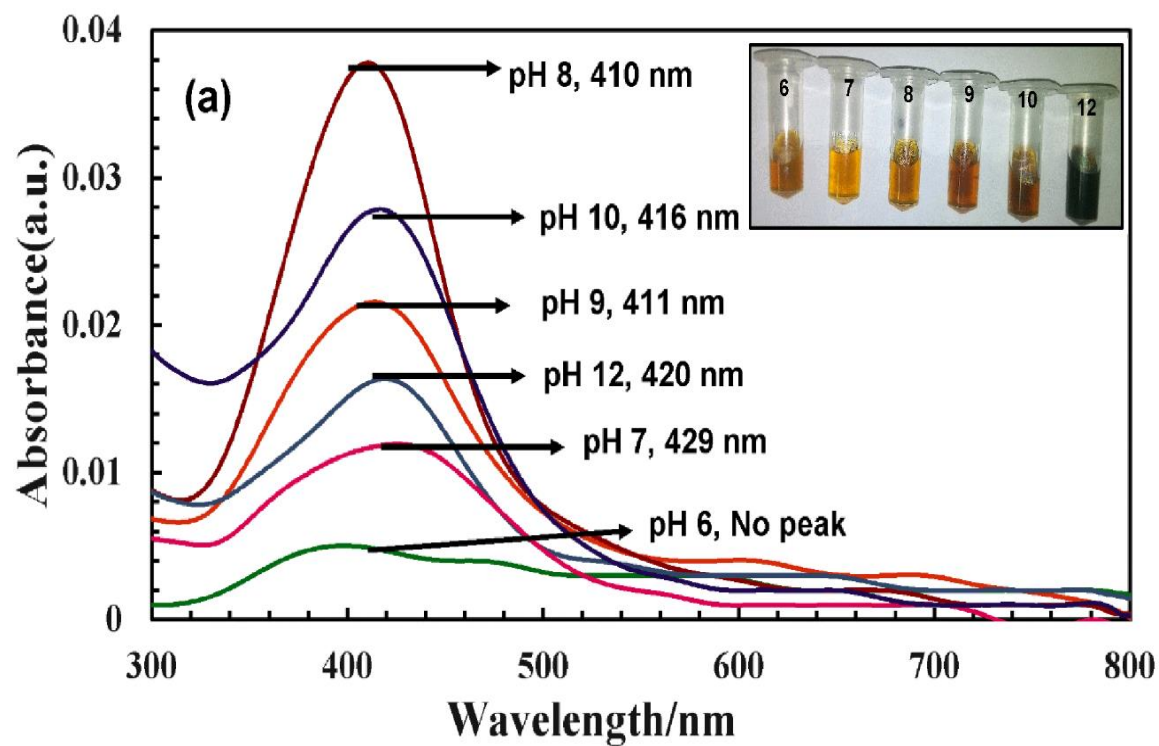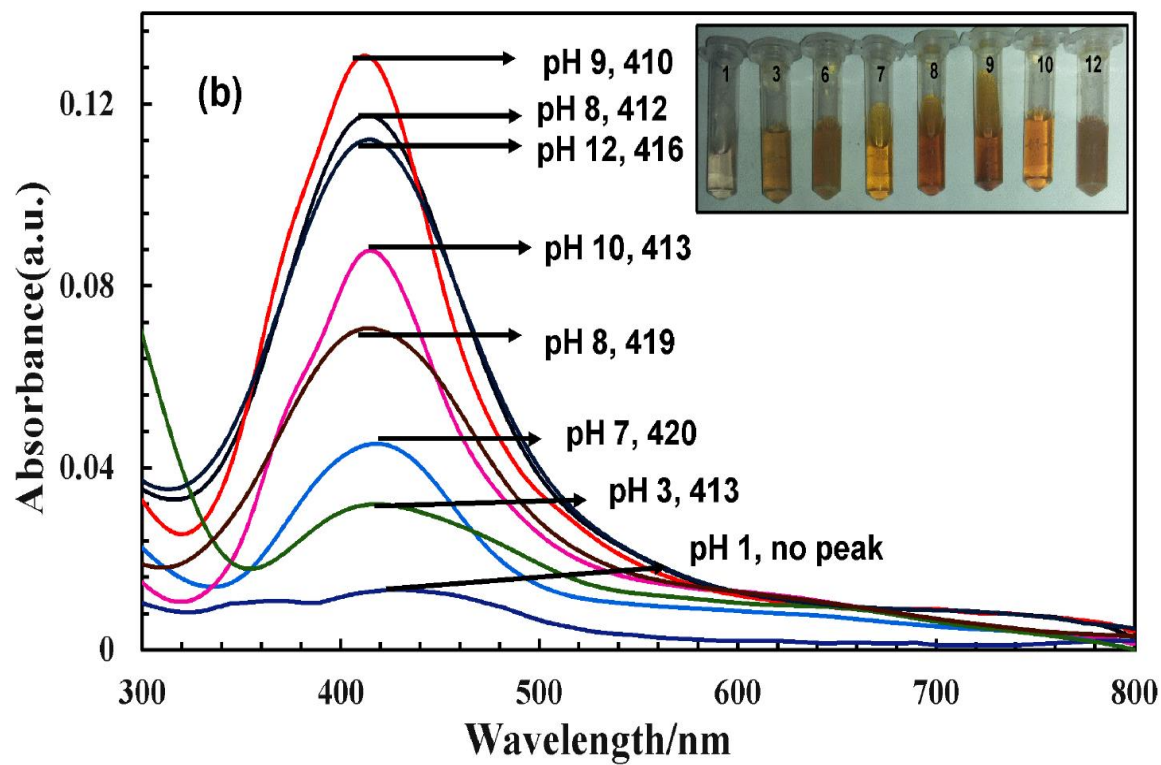

**Figure S1.** Effect of pH (a) on the synthesis, and (b) stability of prepared 5H-I2CA@AgNPs. Inset of figure shows the change in their solutions.

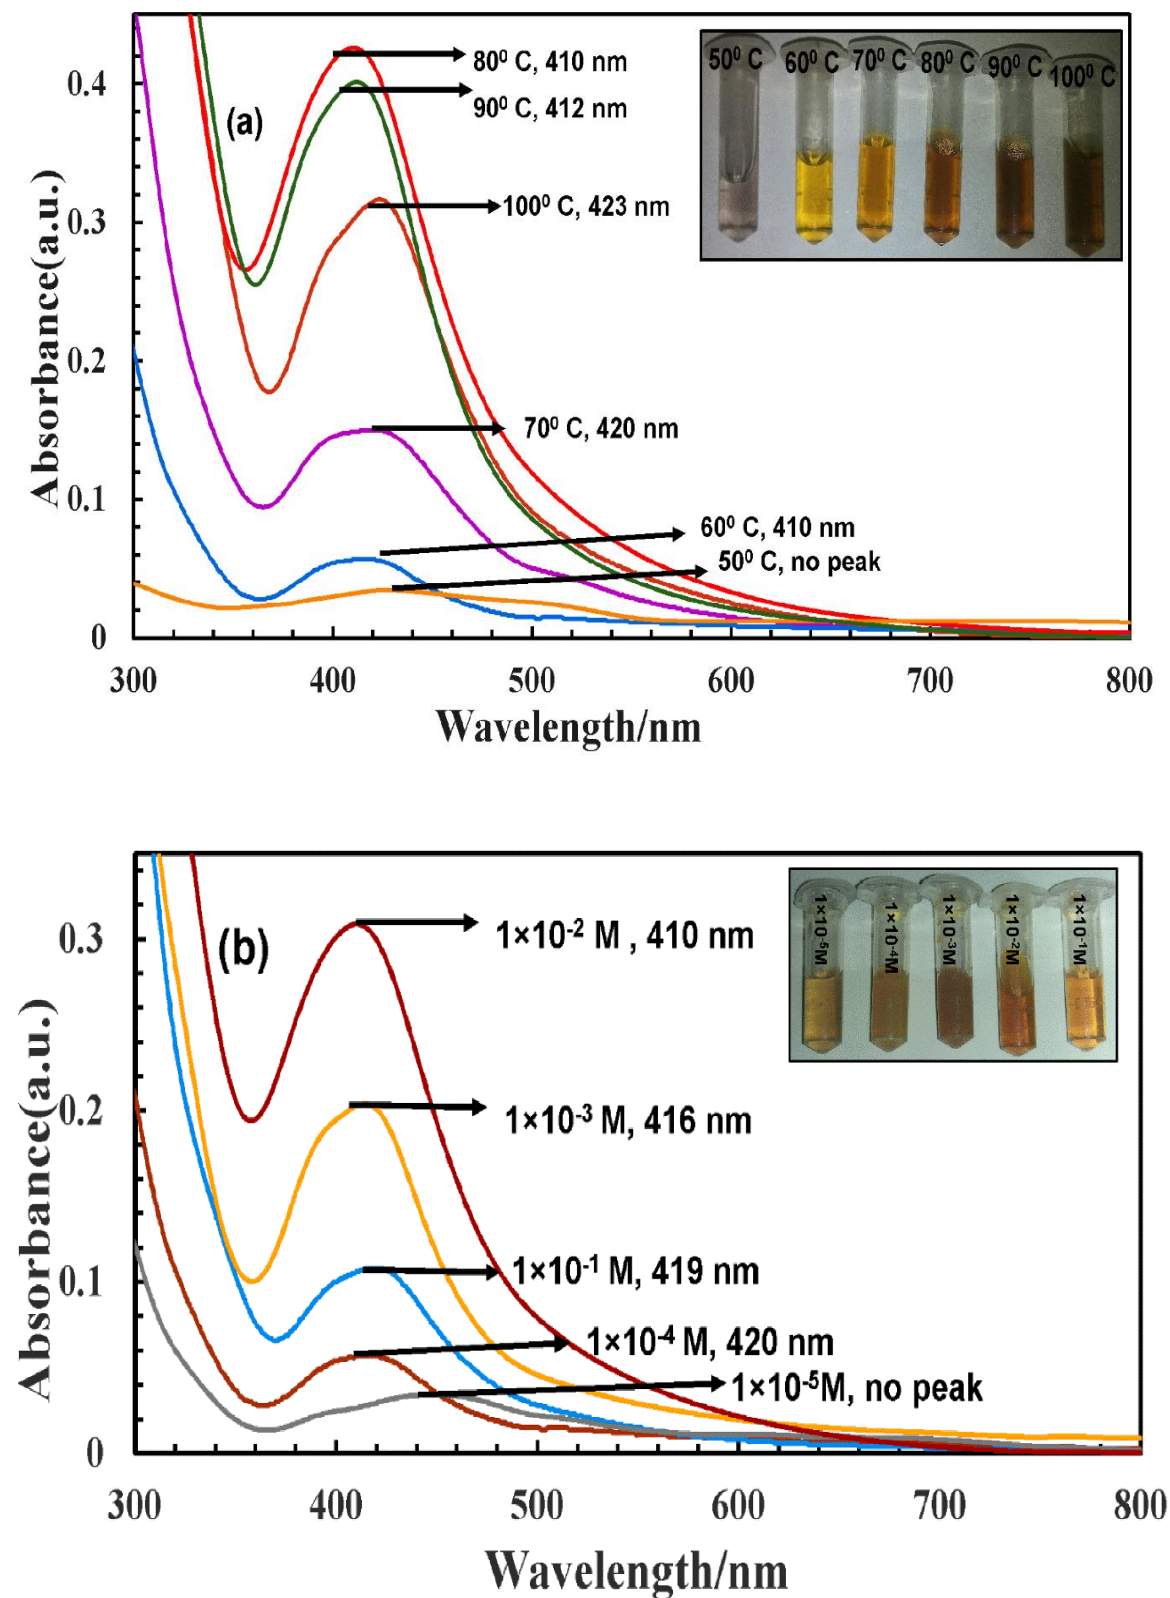

**Figure S2.** (a) UV-vis spectra of the AgNPs prepared at different temperatures, inset shows the photographs of the corresponding solutions, and (b) different concentrations of 5H- I2CA, inset shows colorimetric changes at different concentrations of 5H-I2CA.

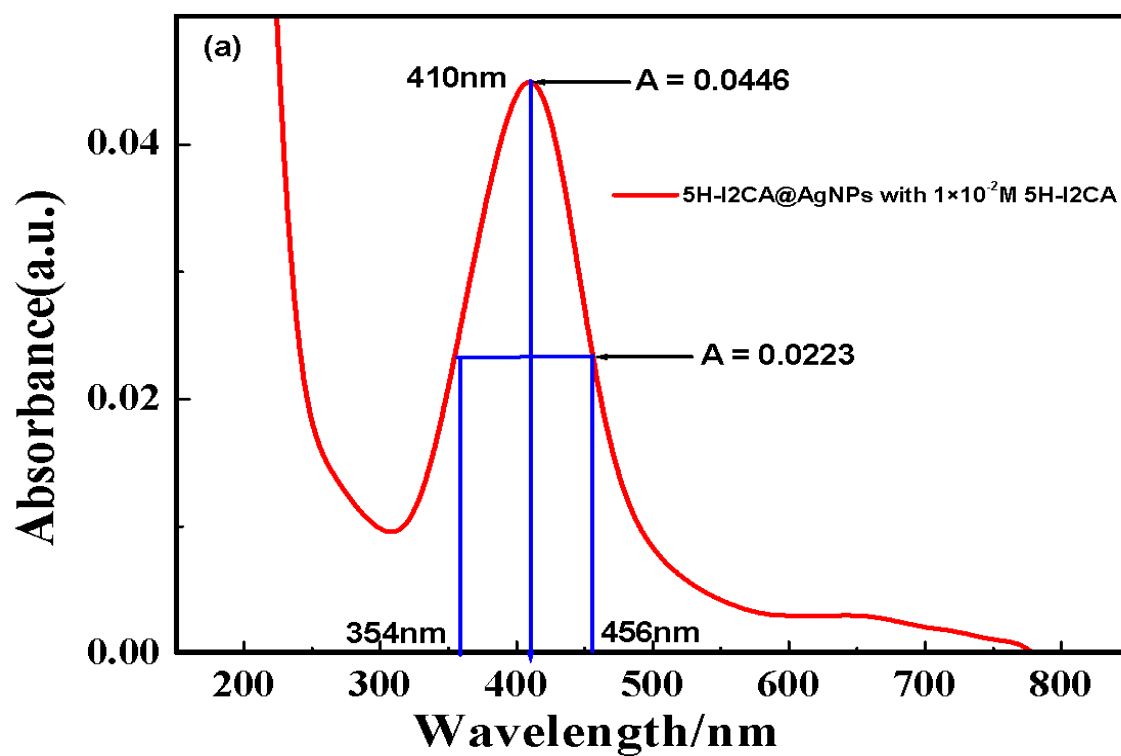

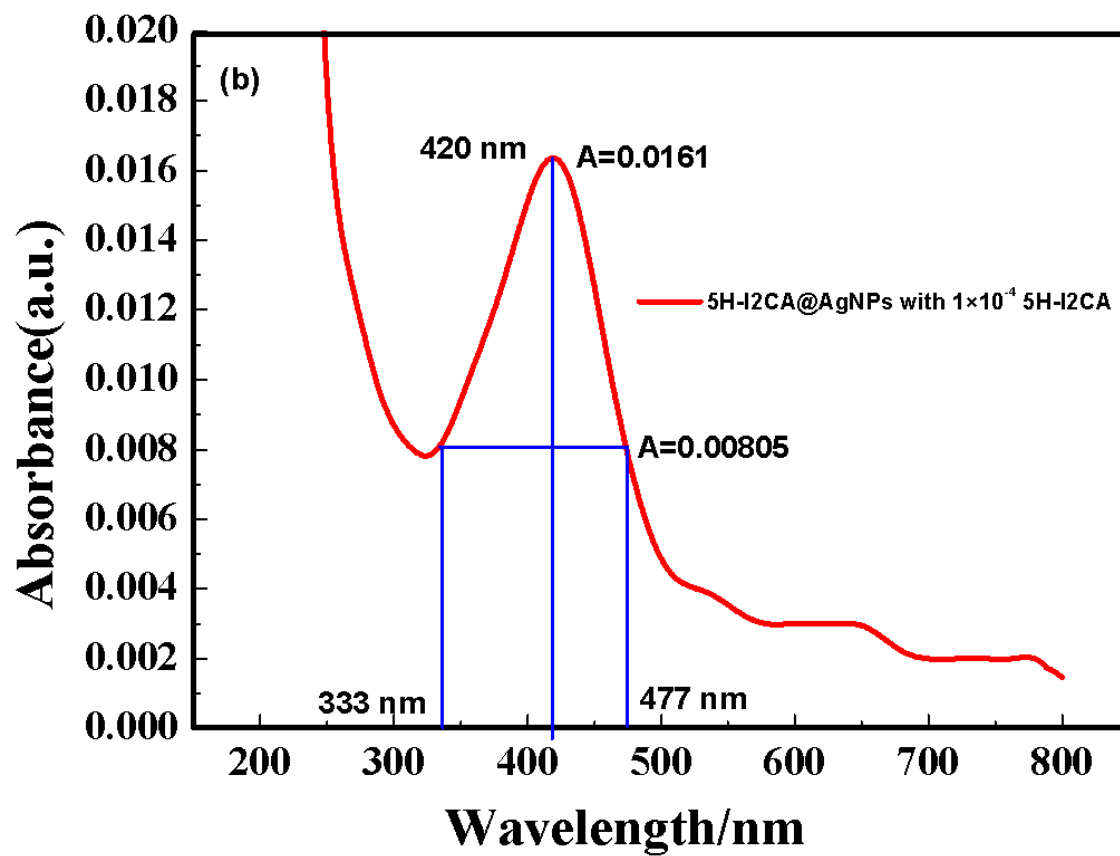

**Figure S3.** (a & b) Represent the calculation of FWHM of 5H-I2CA@AgNPs synthesized at different concentration of 5H-I2CA.

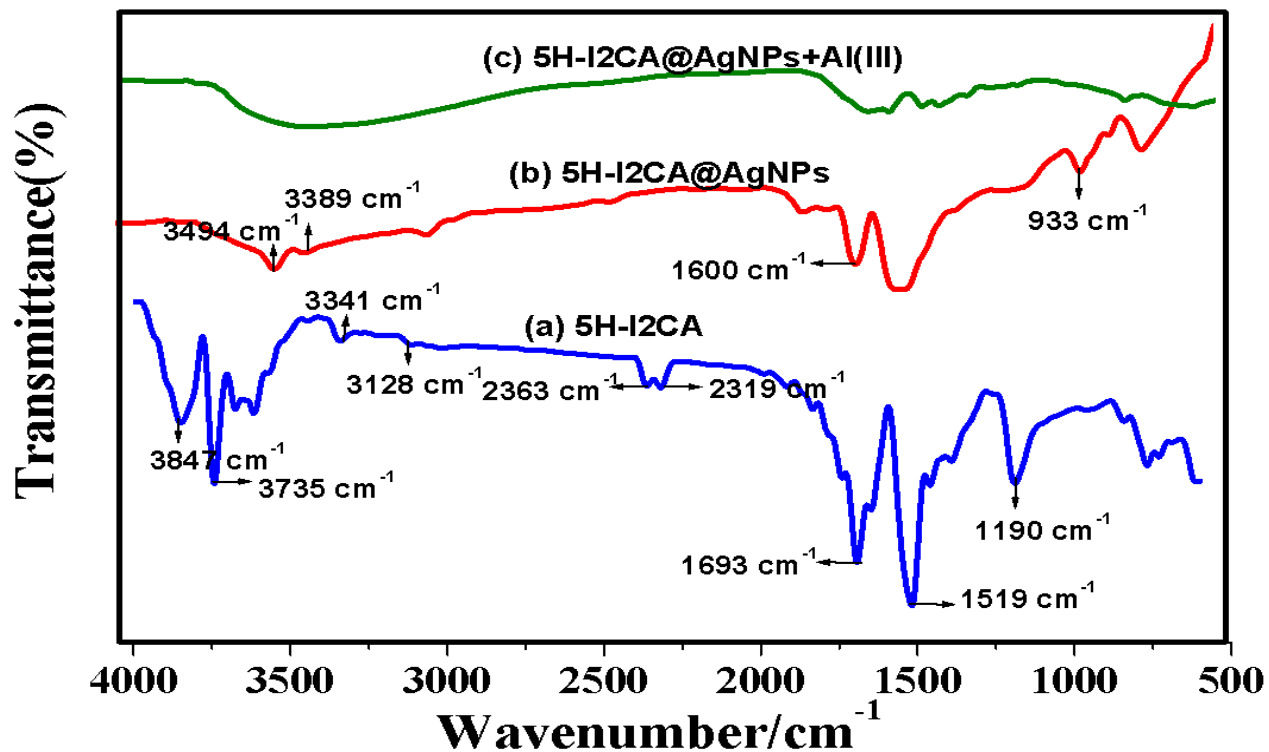

Figure S4. FTIR spectra of (a) 5H-I2CA, (b) 5H-I2CA@AgNPs, (c) 5H-I2CA@AgNPs+Al(III).

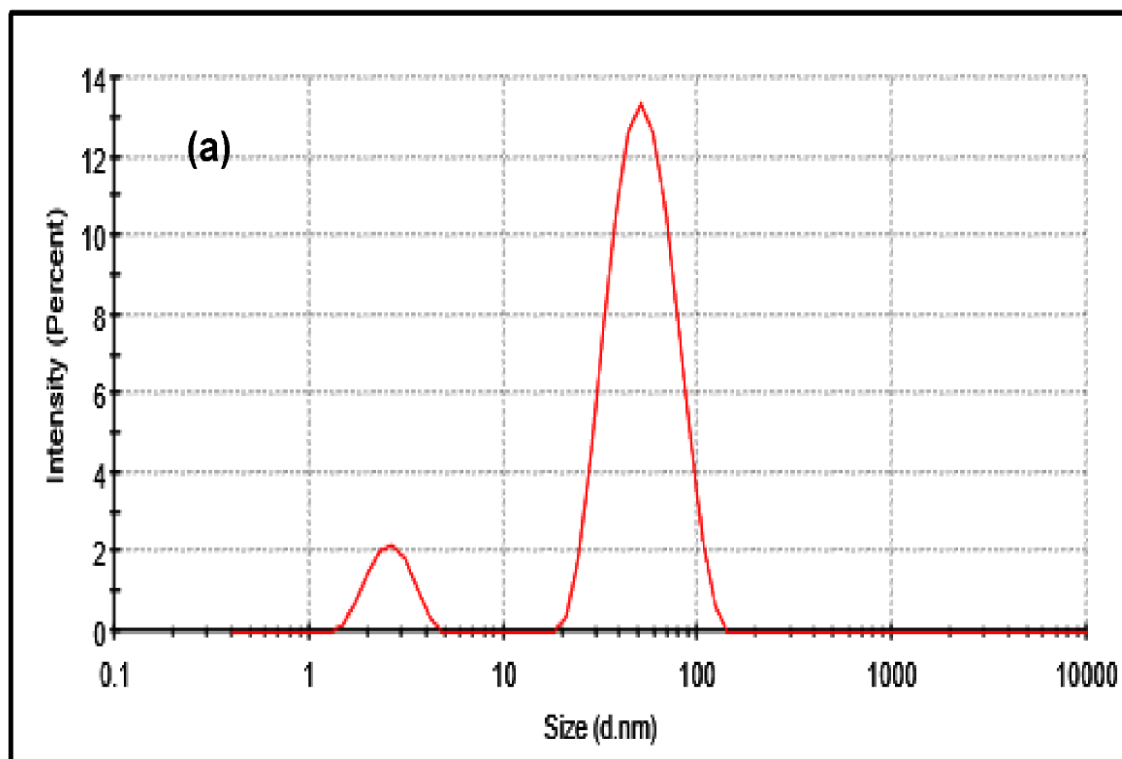

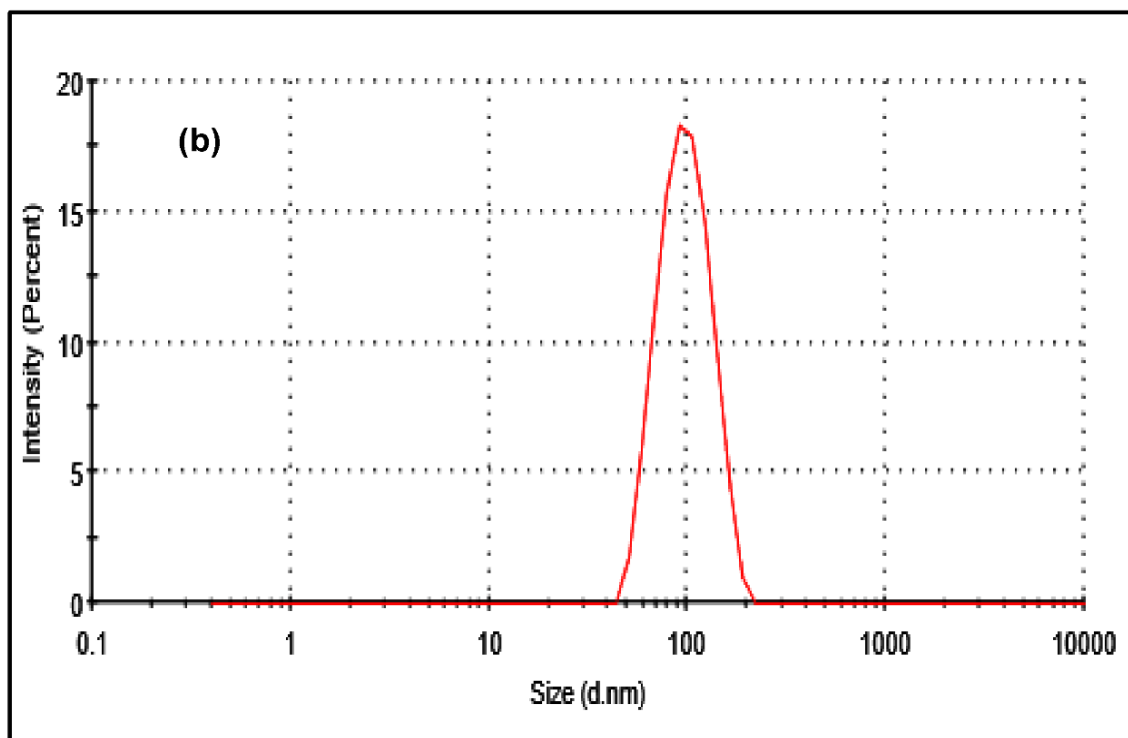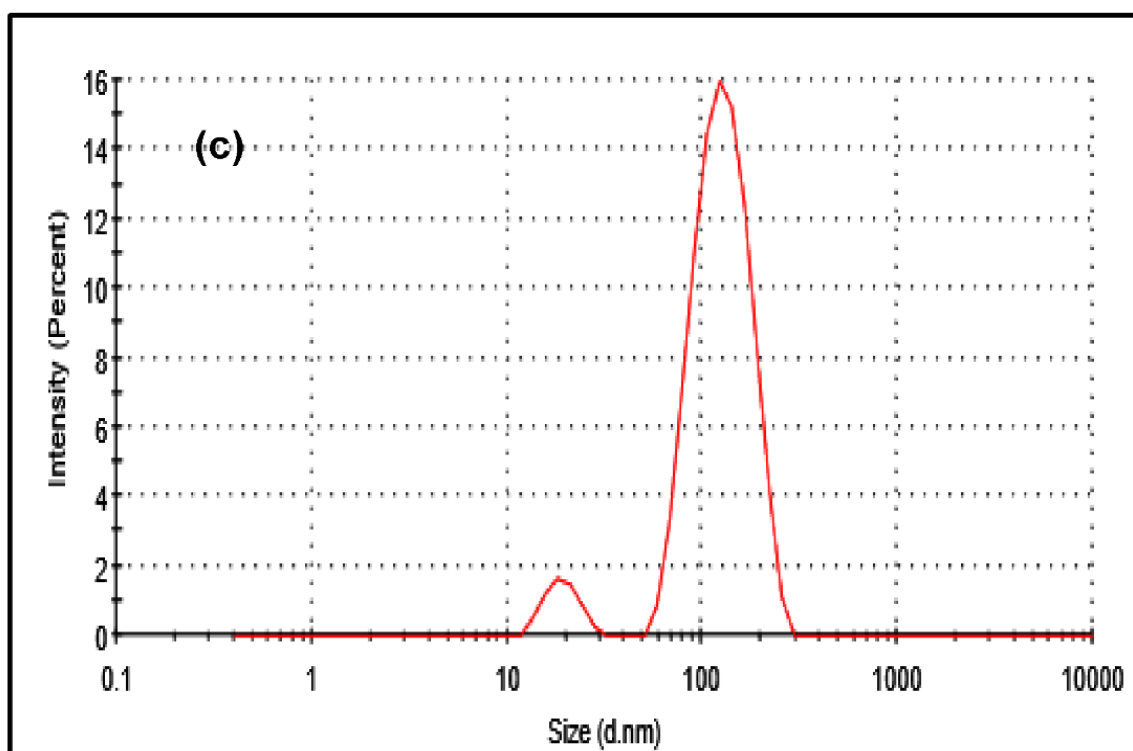

**Figure S5.** (a-c) Size distribution of 5H-I2CA@AgNPs before and after the addition of Al(III) ions.

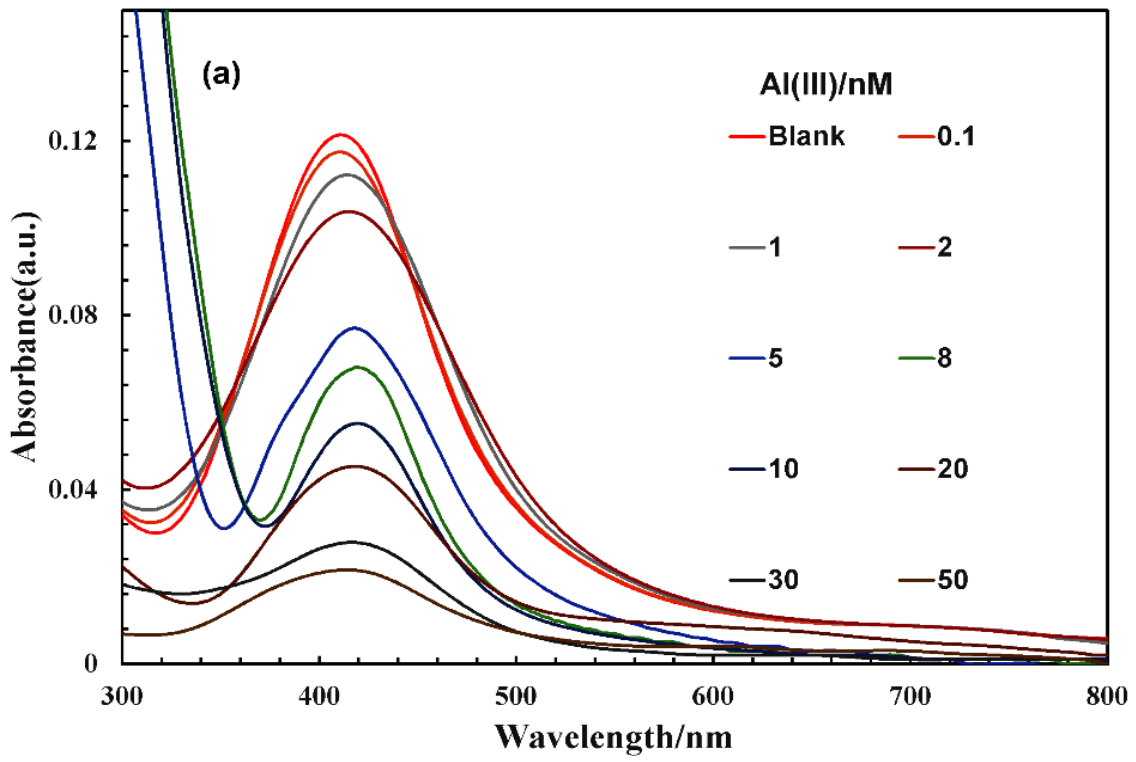



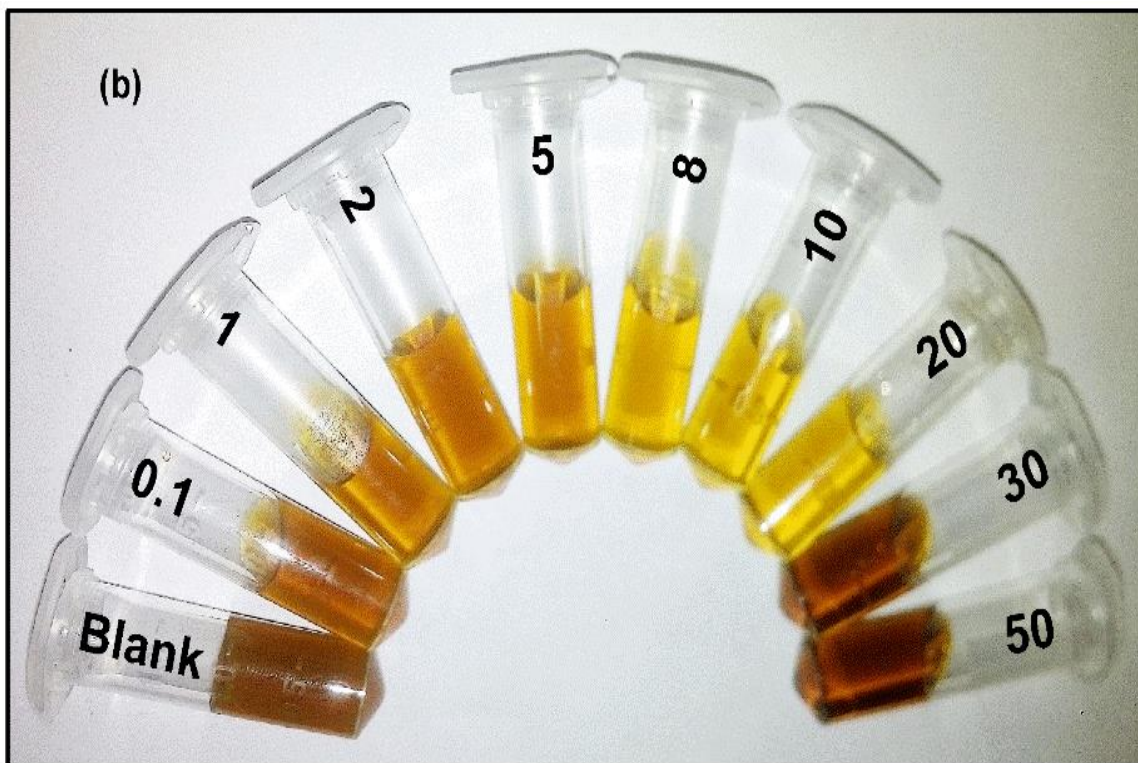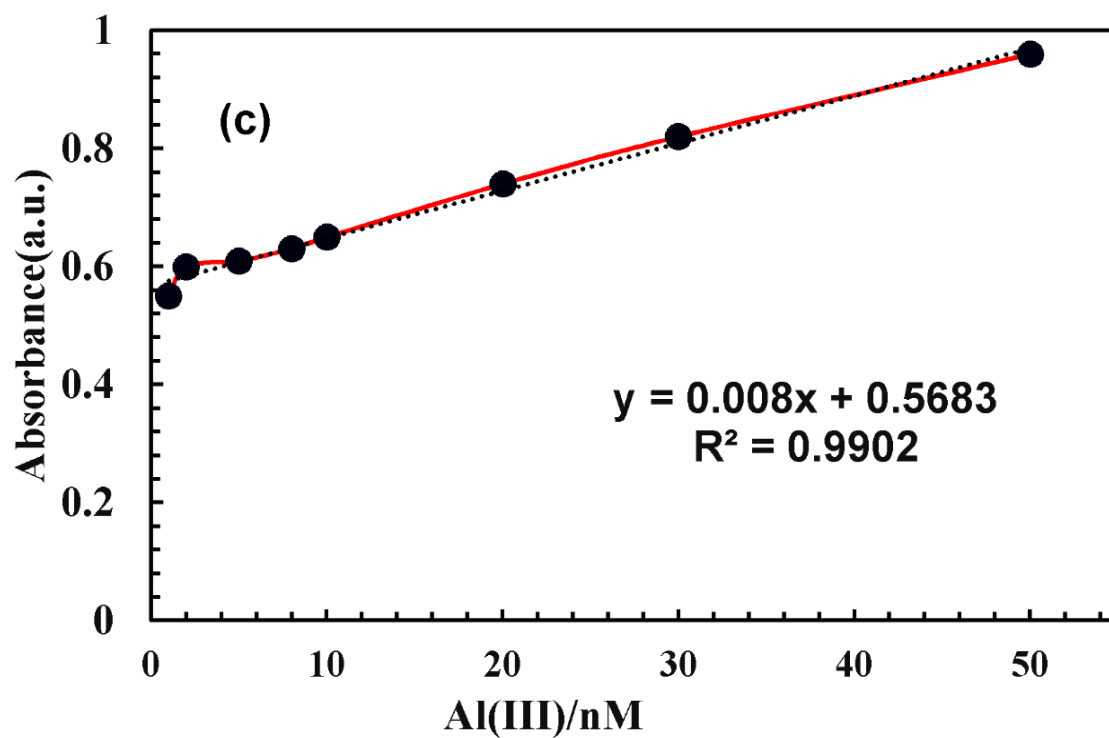

**Figure S6.** (a) SPR spectra of 5H-I2CA@AgNPs after the addition of various concentration of Al(III) ions on to the tap water, (b) Colorimetric response of the synthesized of 5H-I2CA@AgNPs

in tap water, (c) Plot of absorbance intensity difference versus concentrations of Al(III) ions in tap water samples.

**Table S1.** The comparison table demonstrating LOD's of available probes for the detection of the Al(III).

| <b>Method</b> | <b>Sensing probe</b> | <b>Reducing agent</b> | <b>Stabilizing agent</b> | <b>LOD</b> |
|---------------|----------------------|-----------------------|--------------------------|------------|
| Colorimetric  | AuNPs <sup>35</sup>  | NaBH <sub>4</sub>     | MMT                      | 0.53 μM    |
| Colorimetric  | AuNPs <sup>36</sup>  | NaBH <sub>4</sub>     | Triazole ether           | 18 nM      |
| Colorimetric  | AuNPs <sup>37</sup>  | NaBH <sub>4</sub>     | Ionic Liquid             | 1 μm       |
| Colorimetric  | AgNPs <sup>38</sup>  | I2CA                  | I2CA                     | 0.01 ppm   |
| Colorimetric  | AuNPs <sup>54</sup>  | Citrate               | Citrate                  | 1 μM       |
| Colorimetric  | AgNPs <sup>55</sup>  | Mentha                | Mentha                   | 1 nM       |
| Colorimetric  | AgNPs                | 5H-I2CA               | 5H-I2CA                  | 1nM        |
|               | <b>(This work)</b>   |                       |                          |            |
